# Supplementary material for: Magneto-Induced Hyperthermia and Temperature Detection in Single Iron Oxide Core-Silica/Tb3+/Eu3+(Acac) Shell Nano-Objects
Source: MDPI journal article supplement (doi:10.3390/nano12183109), 2022-09-07
Supplement: s1 [file s1]

# Supporting Information

## Magneto-induced hyperthermia and temperature detection in single iron oxide core - silica/Tb<sup>3+</sup>/Eu<sup>3+</sup>(*acac*) shell nano-objects

Karina Nigoghossian<sup>1,\*</sup>, Basile Bouvet<sup>1</sup>, Gautier Félix<sup>1</sup>, Saad Sene<sup>1</sup>, Luca Costa<sup>2</sup>,  
Pierre-Emmanuel Milhet<sup>2</sup>, Albano N. Carneiro Neto<sup>3</sup>, Luis D. Carlos<sup>3</sup>, Erwan Oliviero<sup>1</sup>,  
Yannick Guari<sup>1,\*</sup> and Joulia Larionova<sup>1,\*</sup>

<sup>1</sup> ICGM, Univ. Montpellier, CNRS, ENSCM, Montpellier, France

<sup>2</sup> Centre de Biologie Structurale (CBS), Univ. Montpellier, CNRS, INSERM, Montpellier, France

<sup>3</sup> Phantom-g, Physics Department and CICECO – Aveiro Institute of Materials, University of Aveiro, 3810-193, Aveiro, Portugal

\* Correspondence: joulia.larionova@umontpellier.fr;  
karina.nigoghossian@umontpellier.fr; yannick.guari@umontpellier.fr

## Contents

|                      |          |                        |           |
|----------------------|----------|------------------------|-----------|
| <b>Tables.....</b>   | <b>2</b> | Fig. S6.....           | 9         |
| Table S1 .....       | 2        | Fig. S7 .....          | 9         |
| Table S2 .....       | 2        | Fig. S8.....           | 10        |
| Table S3 .....       | 3        | Fig. S9.....           | 11        |
| Table S4 .....       | 4        | Fig. S10.....          | 11        |
| <b>Figures .....</b> | <b>5</b> | Fig. S11.....          | 13        |
| Fig. S1 .....        | 5        | Fig. S12.....          | 12        |
| Fig. S2 .....        | 6        | Fig. S13.....          | 13        |
| Fig. S3 .....        | 7        | Fig. S14.....          | 14        |
| Fig. S4 .....        | 8        | <b>References.....</b> | <b>14</b> |
| Fig. S5 .....        | 8        |                        |           |

## Tables

**Table S1.** Size distribution of IONP@SiO<sub>2</sub> core@shell nanoparticles and related amount of TEOS.

|     | SiO <sub>2</sub> shell thickness | Whole nanoparticle's size | IONP core size | Well organisation of SiO <sub>2</sub> shell around the IONP core |
|-----|----------------------------------|---------------------------|----------------|------------------------------------------------------------------|
| 1.5 | 8.3 ± 0.2                        | 43.1 ± 2.3                | 26.6 ± 2.0     | no                                                               |
| 2   | 10.7 ± 0.4                       | 46.9 ± 2.5                | 25.4 ± 1.6     | yes                                                              |
| 4   | 13.7 ± 0.5                       | 53.1 ± 3.7                | 25.8 ± 2.6     | yes                                                              |
| 6   | 18.4 ± 0.1                       | 62.0 ± 2.6                | 25.2 ± 2.3     | yes                                                              |
| 8   | 20.8 ± 0.1                       | 66.6 ± 2.1                | 24.9 ± 1.9     | yes                                                              |
| 10  | 22.6 ± 0.1                       | 71.2 ± 3.1                | 26.0 ± 2.9     | yes                                                              |
| 12  | 27.9 ± 0.4                       | 80.8 ± 3.0                | 24.9 ± 2.3     | yes                                                              |

**Table S2.** Band assignment for IR spectra of IONP/OA/OA, IONP@SiO<sub>2</sub>, IONP@SiO<sub>2</sub>-acac/Ln<sup>3+</sup> and acac-silane. [1]

| IONP/OA/OA | IONP@SiO <sub>2</sub> | IONP@SiO <sub>2</sub> -acac/Ln <sup>3+</sup> | Acac-silane    | Assignments                                        |
|------------|-----------------------|----------------------------------------------|----------------|----------------------------------------------------|
| 3315       | -                     | -                                            | -              | $\nu(\text{N-H})$ from $\text{NH}_2$               |
| 3005       | 2980                  | 2950                                         | 2974           | $\nu(\text{C-H})$ from $\text{CH}_3$               |
| 2920       | 2901                  | 2916                                         | 2927           | $\nu_{\text{as}}(\text{C-H})$ from $\text{CH}_2$   |
| 2850       | 2870                  | 2868                                         | 2885           | $\nu_{\text{s}}(\text{C-H})$ from $\text{CH}_2$    |
| 1633       | -                     | -                                            | -              | $\nu(\text{C=C})$                                  |
| -          | 1634                  | 1714; 1634                                   | 1716; 1701     | $\nu(\text{C=O})$ <i>keto</i>                      |
| -          | -                     | -                                            | 1585           | $\nu(\text{C=O})$ <i>enol</i>                      |
| 1557       | -                     | -                                            | -              | $\nu_{\text{as}}(\text{COO})$                      |
| 1464       | -                     | -                                            | -              | $\nu_{\text{s}}(\text{COO})$                       |
| -          | 1406                  | 1454                                         | -              | $\delta_{\text{s}}(\text{C-H})$ from $\text{CH}_2$ |
| -          | 1392                  | 1376                                         | -              | $\nu(\text{C-C})$                                  |
| -          | 957                   | 971                                          | 955            | $\nu(\text{Si-OH})$                                |
| -          | 1066; 795; 456        | 1076; 798; 465                               | 1073; 775; 479 | $\nu(\text{Si-O-Si})$                              |
| 720 - 568  | 568                   | 585                                          | -              | $\nu(\text{Fe-O})$                                 |
| -          | -                     | 410                                          | -              | $\nu(\text{Ln-O})$                                 |

**Table S3.** IET rates (in  $\text{s}^{-1}$ ) from  $T_1$  (donor) to  $\text{Eu}^{3+}$  ion acceptor states.  $\delta$  is the donor-acceptor energy difference (in  $\text{cm}^{-1}$ ).  $W_{d-d}$ ,  $W_{d-m}$ , and  $W_{ex}$  are the dipole-dipole, dipole-multipole, and exchange rates (in  $\text{s}^{-1}$ ).  $W^T$  and  $W_b^T$  are the forward and backward energy transfer rates for each pathway at 25 °C.

| Pathway label ( $n$ ) | Acceptor                                    | $\delta$ | $W_{d-d}$             | $W_{d-m}$             | $W_{ex}$           | $w^T$<br>(forward)    | $w_b^T$<br>(backward)  |
|-----------------------|---------------------------------------------|----------|-----------------------|-----------------------|--------------------|-----------------------|------------------------|
| 1                     | ${}^7\text{F}_0 \rightarrow {}^5\text{D}_0$ | 9707     | $3.61 \times 10^{-2}$ | $1.93 \times 10^1$    | 0                  | $3.25 \times 10^{-2}$ | $1.47 \times 10^{-22}$ |
| 2                     | ${}^7\text{F}_0 \rightarrow {}^5\text{D}_1$ | 7973     | 0                     | 0                     | $1.35 \times 10^5$ | $9.05 \times 10^4$    | $1.77 \times 10^{-12}$ |
| 3                     | ${}^7\text{F}_0 \rightarrow {}^5\text{D}_2$ | 5517     | 1.57                  | $8.39 \times 10^2$    | 0                  | $5.65 \times 10^2$    | $1.55 \times 10^{-9}$  |
| 4                     | ${}^7\text{F}_0 \rightarrow {}^5\text{L}_6$ | 1675     | $2.52 \times 10^2$    | 4.91                  | 0                  | $1.73 \times 10^2$    | $5.33 \times 10^{-2}$  |
| 5                     | ${}^7\text{F}_0 \rightarrow {}^5\text{G}_6$ | 248      | $7.53 \times 10^1$    | 1.47                  | 0                  | $5.16 \times 10^1$    | $1.56 \times 10^1$     |
| 6                     | ${}^7\text{F}_0 \rightarrow {}^5\text{D}_4$ | -586     | $2.19 \times 10^1$    | $3.56 \times 10^1$    | 0                  | 2.28                  | $3.86 \times 10^1$     |
| 7                     | ${}^7\text{F}_1 \rightarrow {}^5\text{D}_0$ | 10079    | 0                     | 0                     | $1.02 \times 10^4$ | $3.33 \times 10^3$    | $2.51 \times 10^{-18}$ |
| 8                     | ${}^7\text{F}_1 \rightarrow {}^5\text{D}_1$ | 8345     | $7.98 \times 10^{-2}$ | $4.27 \times 10^1$    | $2.89 \times 10^1$ | $2.35 \times 10^1$    | $7.62 \times 10^{-17}$ |
| 9                     | ${}^7\text{F}_1 \rightarrow {}^5\text{D}_2$ | 5889     | 0                     | 0                     | $1.66 \times 10^5$ | $5.43 \times 10^4$    | $2.47 \times 10^{-8}$  |
| 10                    | ${}^7\text{F}_1 \rightarrow {}^5\text{D}_3$ | 3017     | 5.41                  | $7.30 \times 10^2$    | 0                  | $2.41 \times 10^2$    | $1.15 \times 10^{-4}$  |
| 11                    | ${}^7\text{F}_1 \rightarrow {}^5\text{L}_6$ | 2047     | $4.49 \times 10^1$    | $8.74 \times 10^{-1}$ | 0                  | $1.50 \times 10^1$    | $7.70 \times 10^{-4}$  |
| 12                    | ${}^7\text{F}_1 \rightarrow {}^5\text{L}_7$ | 1015     | $1.14 \times 10^2$    | 2.22                  | 0                  | $3.81 \times 10^1$    | $2.84 \times 10^{-1}$  |
| 13                    | ${}^7\text{F}_1 \rightarrow {}^5\text{G}_2$ | 980      | 0                     | 0                     | $2.47 \times 10^6$ | $8.10 \times 10^5$    | $7.16 \times 10^3$     |
| 14                    | ${}^7\text{F}_1 \rightarrow {}^5\text{G}_3$ | 750      | 9.14                  | $7.11 \times 10^2$    | 0                  | $2.36 \times 10^2$    | 6.33                   |
| 15                    | ${}^7\text{F}_1 \rightarrow {}^5\text{G}_6$ | 620      | $3.24 \times 10^1$    | $6.31 \times 10^{-1}$ | 0                  | $1.08 \times 10^1$    | $5.44 \times 10^{-1}$  |
| 16                    | ${}^7\text{F}_1 \rightarrow {}^5\text{G}_5$ | 609      | $6.69 \times 10^1$    | 5.55                  | 0                  | $2.38 \times 10^1$    | 1.26                   |
|                       |                                             |          |                       |                       | $W^T$              | $9.59 \times 10^5$    |                        |
|                       |                                             |          |                       |                       | $W_b^T$            |                       | $7.22 \times 10^3$     |

Note: The IET involving the transition  ${}^7\text{F}_0 \rightarrow {}^5\text{D}_0$  was calculated considering the J-mixing effect.

**Table S4.** IET rates (in s<sup>-1</sup>) from T<sub>1</sub> (donor) to Tb<sup>3+</sup> ion acceptor states.  $\delta$  is the donor-acceptor energy difference (in cm<sup>-1</sup>).  $W_{d-d}$ ,  $W_{d-m}$ , and  $W_{ex}$  are the dipole-dipole, dipole-multipole, and exchange rates (in s<sup>-1</sup>).  $W^T$  and  $W_b^T$  are the forward and backward energy transfer rates for each pathway at 25 °C.

| pathway<br>label ( <i>n</i> ) | acceptor                                                   | $\delta$ | $W_{d-d}$             | $W_{d-m}$             | $W_{ex}$              | $w^T$<br>(forward)         | $w_b^T$<br>(backward)  |
|-------------------------------|------------------------------------------------------------|----------|-----------------------|-----------------------|-----------------------|----------------------------|------------------------|
| 1                             | <sup>7</sup> F <sub>6</sub> → <sup>5</sup> D <sub>4</sub>  | 6556     | 2.06×10 <sup>-1</sup> | 2.71×10 <sup>1</sup>  | 0                     | 2.73×10 <sup>1</sup>       | 4.98×10 <sup>-13</sup> |
| 2                             | <sup>7</sup> F <sub>6</sub> → <sup>5</sup> D <sub>3</sub>  | 764      | 2.88                  | 3.55×10 <sup>-1</sup> | 0                     | 3.23                       | 8.10×10 <sup>-2</sup>  |
| 3                             | <sup>7</sup> F <sub>6</sub> → <sup>5</sup> G <sub>6</sub>  | 577      | 2.24×10 <sup>2</sup>  | 1.30×10 <sup>3</sup>  | 3.19×10 <sup>7</sup>  | 3.19×10 <sup>7</sup>       | 1.97×10 <sup>6</sup>   |
| 4                             | <sup>7</sup> F <sub>6</sub> → <sup>5</sup> L <sub>10</sub> | 29       | 1.10×10 <sup>2</sup>  | 1.56                  | 0                     | 1.11×10 <sup>2</sup>       | 9.67×10 <sup>1</sup>   |
| 5                             | <sup>7</sup> F <sub>6</sub> → <sup>5</sup> G <sub>5</sub>  | -767     | 2.89×10 <sup>1</sup>  | 9.49×10 <sup>2</sup>  | 2.15×10 <sup>6</sup>  | 5.31×10 <sup>4</sup>       | 2.15×10 <sup>6</sup>   |
| 6                             | <sup>7</sup> F <sub>6</sub> → <sup>5</sup> D <sub>2</sub>  | -1107    | 1.37                  | 1.31×10 <sup>-2</sup> | 0                     | 6.62×10 <sup>-3</sup>      | 1.38                   |
| 7                             | <sup>7</sup> F <sub>6</sub> → <sup>5</sup> G <sub>4</sub>  | -1287    | 1.51×10 <sup>1</sup>  | 7.32×10 <sup>1</sup>  | 0                     | 1.77×10 <sup>-1</sup>      | 8.82×10 <sup>1</sup>   |
| 8                             | <sup>7</sup> F <sub>6</sub> → <sup>5</sup> L <sub>9</sub>  | -1408    | 7.93×10 <sup>1</sup>  | 3.85                  | 0                     | 9.31×10 <sup>-2</sup>      | 8.31×10 <sup>1</sup>   |
| 9                             | <sup>7</sup> F <sub>6</sub> → <sup>5</sup> G <sub>3</sub>  | -1977    | 4.45                  | 1.69×10 <sup>-1</sup> | 0                     | 3.32×10 <sup>-4</sup>      | 4.62                   |
| 10                            | <sup>7</sup> F <sub>6</sub> → <sup>5</sup> L <sub>8</sub>  | -2190    | 3.08×10 <sup>1</sup>  | 4.13×10 <sup>-1</sup> | 0                     | 8.03×10 <sup>-4</sup>      | 3.12×10 <sup>1</sup>   |
| 11                            | <sup>7</sup> F <sub>6</sub> → <sup>5</sup> L <sub>7</sub>  | -2457    | 1.50×10 <sup>1</sup>  | 3.63×10 <sup>2</sup>  | 1.45×10 <sup>1</sup>  | 2.78×10 <sup>-3</sup>      | 3.92×10 <sup>2</sup>   |
| 12                            | <sup>7</sup> F <sub>6</sub> → <sup>5</sup> G <sub>2</sub>  | -2531    | 5.74×10 <sup>-1</sup> | 5.49×10 <sup>-3</sup> | 0                     | 2.88×10 <sup>-6</sup>      | 5.80×10 <sup>-1</sup>  |
| 13                            | <sup>7</sup> F <sub>6</sub> → <sup>5</sup> L <sub>6</sub>  | -2610    | 0                     | 0                     | 3.13×10 <sup>5</sup>  | 1.06                       | 3.13×10 <sup>5</sup>   |
| 14                            | <sup>7</sup> F <sub>6</sub> → <sup>5</sup> H <sub>7</sub>  | -4379    | 0                     | 0                     | 1.35×10 <sup>5</sup>  | 8.94×10 <sup>-5</sup>      | 1.35×10 <sup>5</sup>   |
| 15                            | <sup>7</sup> F <sub>6</sub> → <sup>5</sup> H <sub>6</sub>  | -5891    | 0                     | 0                     | 3.28×10 <sup>5</sup>  | 1.48×10 <sup>-7</sup>      | 3.28×10 <sup>5</sup>   |
| 16                            | <sup>7</sup> F <sub>6</sub> → <sup>5</sup> H <sub>5</sub>  | -6767    | 0                     | 0                     | 1.54×10 <sup>-3</sup> | 1.01×10 <sup>-17</sup>     | 1.54×10 <sup>-3</sup>  |
| 17                            | <sup>7</sup> F <sub>6</sub> → <sup>5</sup> F <sub>5</sub>  | -7934    | 0                     | 0                     | 7.64×10 <sup>4</sup>  | 1.80×10 <sup>-12</sup>     | 7.64×10 <sup>4</sup>   |
| 18                            | <sup>7</sup> F <sub>5</sub> → <sup>5</sup> D <sub>4</sub>  | 8604     | 1.31×10 <sup>-1</sup> | 4.62×10 <sup>1</sup>  | 1.19×10 <sup>4</sup>  | 1.20×10 <sup>4</sup>       | 1.11×10 <sup>-14</sup> |
| 19                            | <sup>7</sup> F <sub>5</sub> → <sup>5</sup> D <sub>3</sub>  | 2812     | 5.92                  | 2.68×10 <sup>2</sup>  | 0                     | 2.74×10 <sup>2</sup>       | 3.50×10 <sup>-4</sup>  |
| 20                            | <sup>7</sup> F <sub>5</sub> → <sup>5</sup> G <sub>6</sub>  | 2625     | 2.10×10 <sup>1</sup>  | 2.30×10 <sup>3</sup>  | 2.99×10 <sup>6</sup>  | 2.99×10 <sup>6</sup>       | 9.44                   |
| 21                            | <sup>7</sup> F <sub>5</sub> → <sup>5</sup> L <sub>10</sub> | 2077     | 2.39                  | 2.29×10 <sup>-2</sup> | 0                     | 2.41                       | 1.07×10 <sup>-4</sup>  |
| 22                            | <sup>7</sup> F <sub>5</sub> → <sup>5</sup> G <sub>5</sub>  | 1281     | 1.33×10 <sup>1</sup>  | 8.64×10 <sup>1</sup>  | 1.49×10 <sup>7</sup>  | 1.49×10 <sup>7</sup>       | 3.09×10 <sup>4</sup>   |
| 23                            | <sup>7</sup> F <sub>5</sub> → <sup>5</sup> D <sub>2</sub>  | 941      | 6.85                  | 5.17                  | 0                     | 1.20×10 <sup>1</sup>       | 1.28×10 <sup>-1</sup>  |
| 24                            | <sup>7</sup> F <sub>5</sub> → <sup>5</sup> G <sub>4</sub>  | 761      | 5.53                  | 4.66×10 <sup>2</sup>  | 2.06×10 <sup>6</sup>  | 2.06×10 <sup>6</sup>       | 5.22×10 <sup>4</sup>   |
| 25                            | <sup>7</sup> F <sub>5</sub> → <sup>5</sup> L <sub>9</sub>  | 640      | 3.08×10 <sup>1</sup>  | 1.67                  | 0                     | 3.25×10 <sup>1</sup>       | 1.48                   |
| 26                            | <sup>7</sup> F <sub>5</sub> → <sup>5</sup> L <sub>8</sub>  | -142     | 5.08×10 <sup>1</sup>  | 4.33                  | 0                     | 2.78×10 <sup>1</sup>       | 5.51×10 <sup>1</sup>   |
| 27                            | <sup>7</sup> F <sub>5</sub> → <sup>5</sup> L <sub>7</sub>  | -409     | 1.56×10 <sup>1</sup>  | 1.93×10 <sup>2</sup>  | 0                     | 2.90×10 <sup>1</sup>       | 2.09×10 <sup>2</sup>   |
| 28                            | <sup>7</sup> F <sub>5</sub> → <sup>5</sup> L <sub>6</sub>  | -562     | 0                     | 0                     | 8.31×10 <sup>4</sup>  | 5.52×10 <sup>3</sup>       | 8.31×10 <sup>4</sup>   |
| 29                            | <sup>7</sup> F <sub>5</sub> → <sup>5</sup> H <sub>6</sub>  | -3843    | 0                     | 0                     | 2.33×10 <sup>5</sup>  | 2.05×10 <sup>-3</sup>      | 2.33×10 <sup>5</sup>   |
| 30                            | <sup>7</sup> F <sub>5</sub> → <sup>5</sup> H <sub>5</sub>  | -4719    | 0                     | 0                     | 1.63×10 <sup>6</sup>  | 2.10×10 <sup>-4</sup>      | 1.63×10 <sup>6</sup>   |
| 31                            | <sup>7</sup> F <sub>5</sub> → <sup>5</sup> F <sub>5</sub>  | -5886    | 0                     | 0                     | 8.33×10 <sup>5</sup>  | 3.84×10 <sup>-7</sup>      | 8.33×10 <sup>5</sup>   |
|                               |                                                            |          |                       |                       | $W^T$                 | <b>5.20×10<sup>7</sup></b> |                        |
|                               |                                                            |          |                       |                       | $W_b^T$               | <b>7.84×10<sup>6</sup></b> |                        |

## Figures

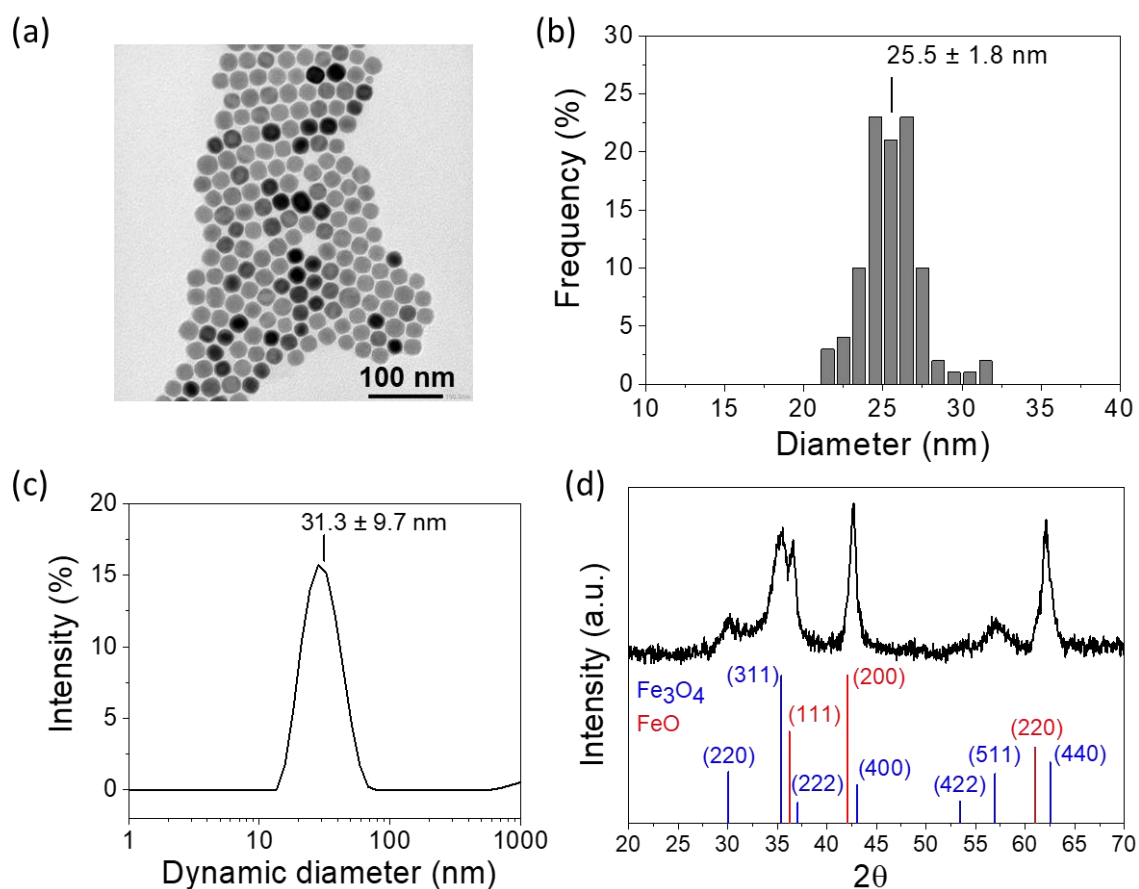

**Figure S1.** (a) TEM image of IONP/OA/OA and (b) corresponding particle size distribution ( $n = 100$ ); (c) Dynamic size distribution of IONP/OA/OA solution in cyclohexane estimated by DLS; (d) XRD pattern of IONP/OA/OA powder and reference diffraction peaks corresponding to Fe<sub>3</sub>O<sub>4</sub> [2] and FeO [3].

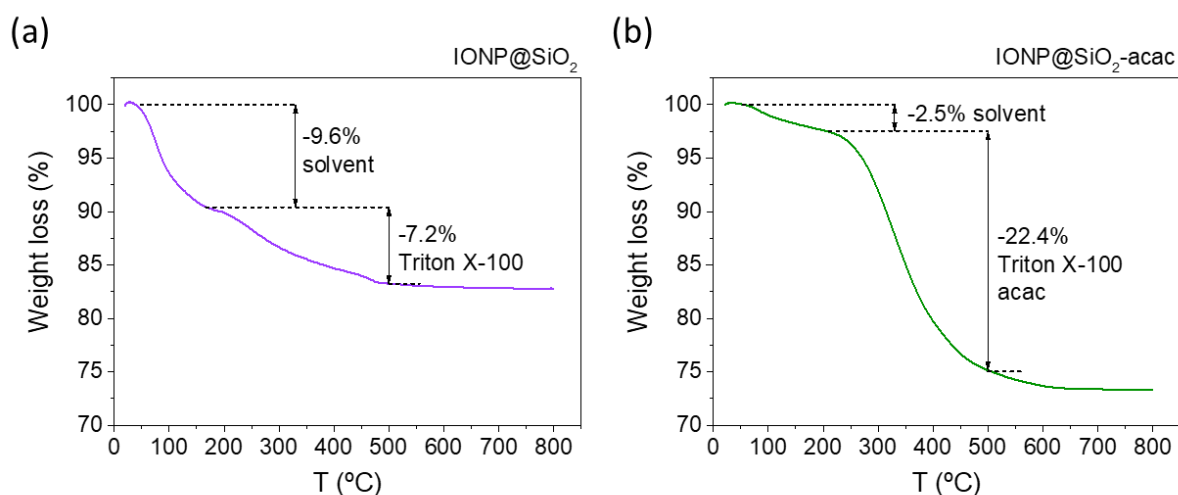

**Figure S2.** TGA analyses obtained with a  $5\text{ }^{\circ}\text{C min}^{-1}$  heating rate under air for: (a) IONP@SiO<sub>2</sub> (chosen nanoparticles with *ca.* 11 nm silica shell) and (b) corresponding IONP@SiO<sub>2</sub>-acac nanoparticles. *Note:* In the thermogravimetric (TGA) curve for IONP@SiO<sub>2</sub>, a weight loss of 9.6 % occurred at 165 °C is attributed to the solvent molecules sorbed in the silica pores. A weight loss of 7.2 % observed in the 200–450 °C temperature range can be attributed to residual Triton X-100 molecules [4] used for the micelle formation during the silica coating step [5]. In the case of IONP@SiO<sub>2</sub>-acac, the first weight loss of 2.5% attributed to the loss of sorbed solvent molecules occurred at around 160 °C. It followed by the main loss of 22.4% between 200 and 500 °C. This latter can be associated with the thermal degradation of both, the *acac*-silane ligand grafted to the silica shell and the surfactant. The comparison between TG curves of IONP@SiO<sub>2</sub> and IONP@SiO<sub>2</sub>-acac leads to the estimation of the *acac* fraction of 15.2%. This corresponds to the loss of organic moieties of *acac* ( $-(\text{CH}_2)_3\text{CH}[\text{CH}_3\text{C}(\text{O})_2]_2$  ( $141.2\text{ g mol}^{-1}$ )) in IONP@SiO<sub>2</sub>-acac and allows the proposition of the stoichiometric formula **IONP@12.3SiO<sub>2</sub>/[(CH<sub>3</sub>C(O))<sub>2</sub>CH(CH<sub>2</sub>)<sub>3</sub>SiO<sub>1.5</sub>**. From SEM-EDX results (Section 2.2.5 of the main article) with the weight ratio between Lanthanides and Si ( $\text{Ln}^{3+}/\text{Si} = 25.8/74.2$ ), the stoichiometric formula after Tb<sup>3+</sup>/Eu<sup>3+</sup> grafting was **IONP@12.3SiO<sub>2</sub>/[(CH<sub>3</sub>C(O))<sub>2</sub>CH(CH<sub>2</sub>)<sub>3</sub>SiO<sub>1.5</sub>(Eu<sub>0.05</sub>Tb<sub>0.95</sub>)<sub>0.8</sub>**.

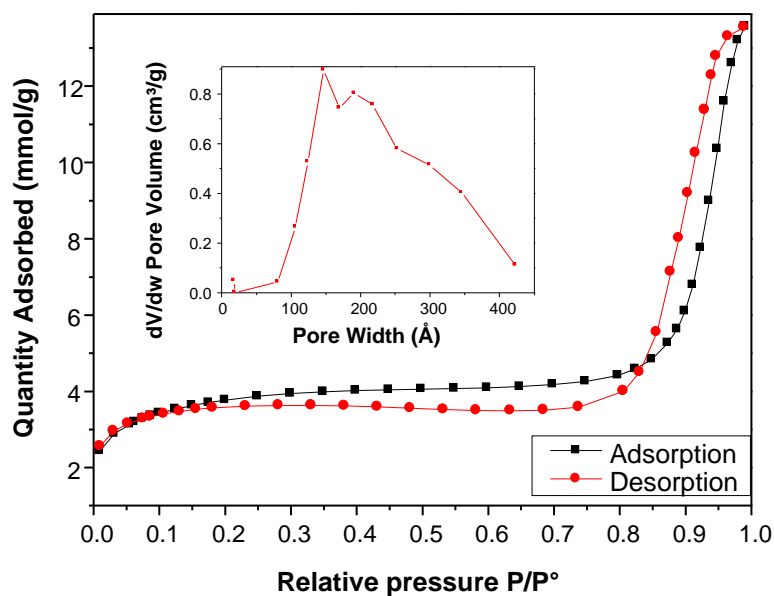

**Figure S3.** BET adsorption/desorption isotherms for nitrogen adsorption capacity of IONP@SiO<sub>2</sub>.

Specific surface of 315 m<sup>2</sup>g<sup>-1</sup> has been estimated by Brunauer–Emmett–Teller (BET) method

*Note:* similar shape of adsorption-desorption isotherms has already been obtained for other inorganic core@silica shell nanoparticles prepared by using the micelle inverse method. The observed porosity has been attributed to the interparticle voids.[6],[7]

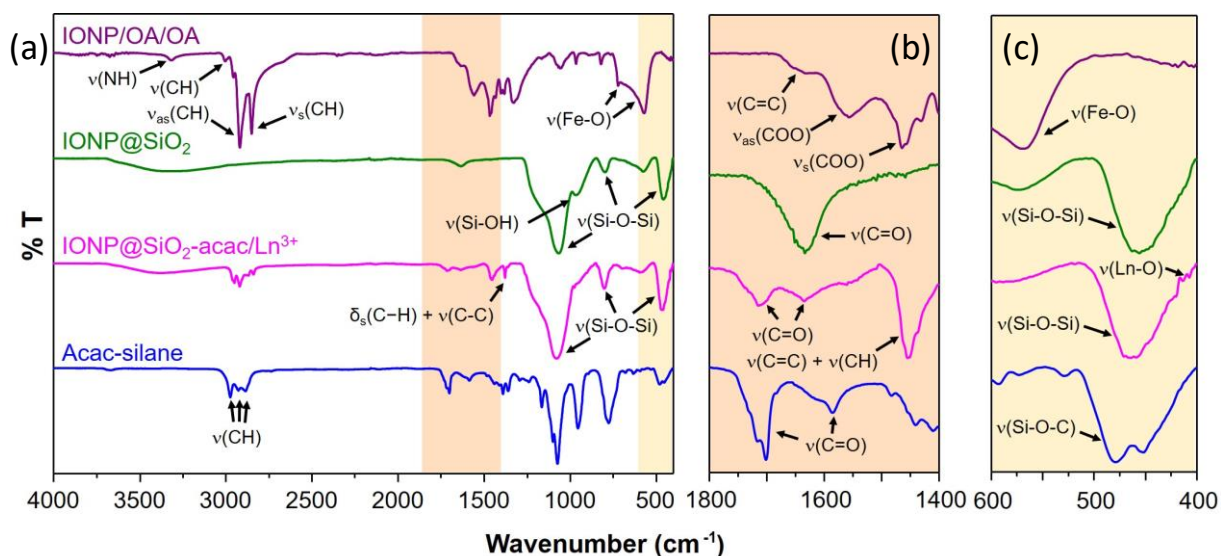

**Figure S4.** IR spectra of IONP/OA/OA, IONP@SiO<sub>2</sub>, IONP@SiO<sub>2</sub>-acac/Ln<sup>3+</sup> and acac-silane in: (a) the full analyzed range 4000–400 cm<sup>-1</sup>, (b) the magnification in the window 1800–1400 cm<sup>-1</sup>, (c) the magnification in the window 600–400 cm<sup>-1</sup>.

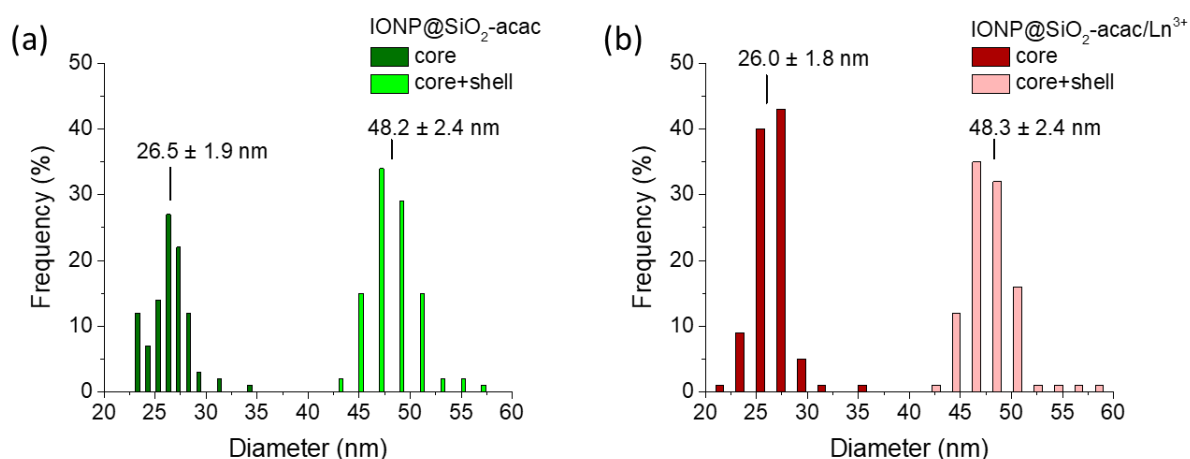

**Figure S5.** Size distributions of (a) IONP@SiO<sub>2</sub>-acac and (b) IONP@SiO<sub>2</sub>-acac/Tb<sup>3+</sup>/Eu<sup>3+</sup> (number of counted particles = 100).



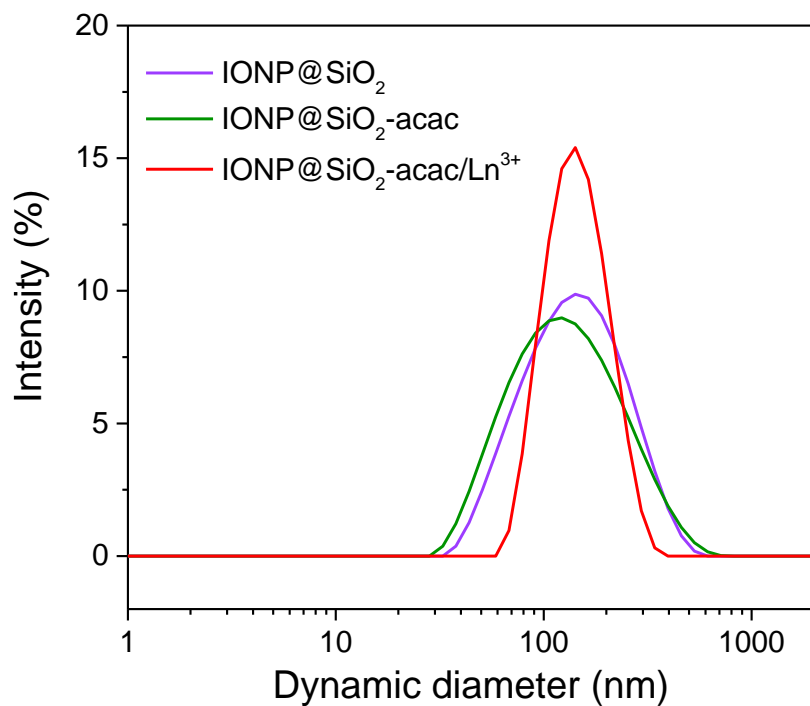

**Figure S6.** DLS size distribution of IONP@SiO<sub>2</sub> (*ca.*11 nm- silica shell), IONP@SiO<sub>2</sub>-acac and IONP@SiO<sub>2</sub>-acac/Ln<sup>3+</sup> dispersed in ethanol with average dynamic diameters of 159, 150 and 151 nm, respectively.

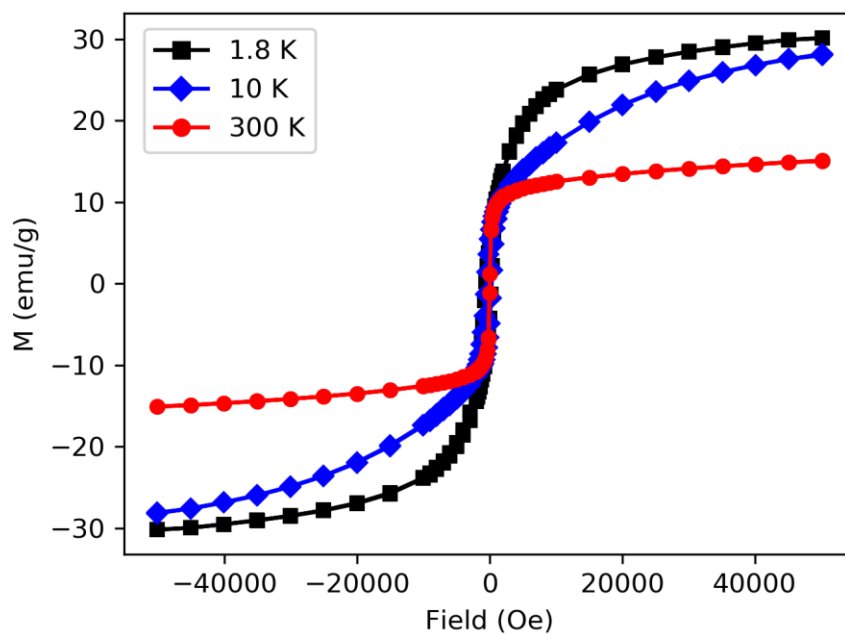

**Figure S7.** Field dependence of the magnetization for IONP@SiO<sub>2</sub>-acac/Tb<sup>3+</sup>/Eu<sup>3+</sup> nanoparticles at 1.8 K (black square), 10 K (blue diamond) and 300 K (red circle).

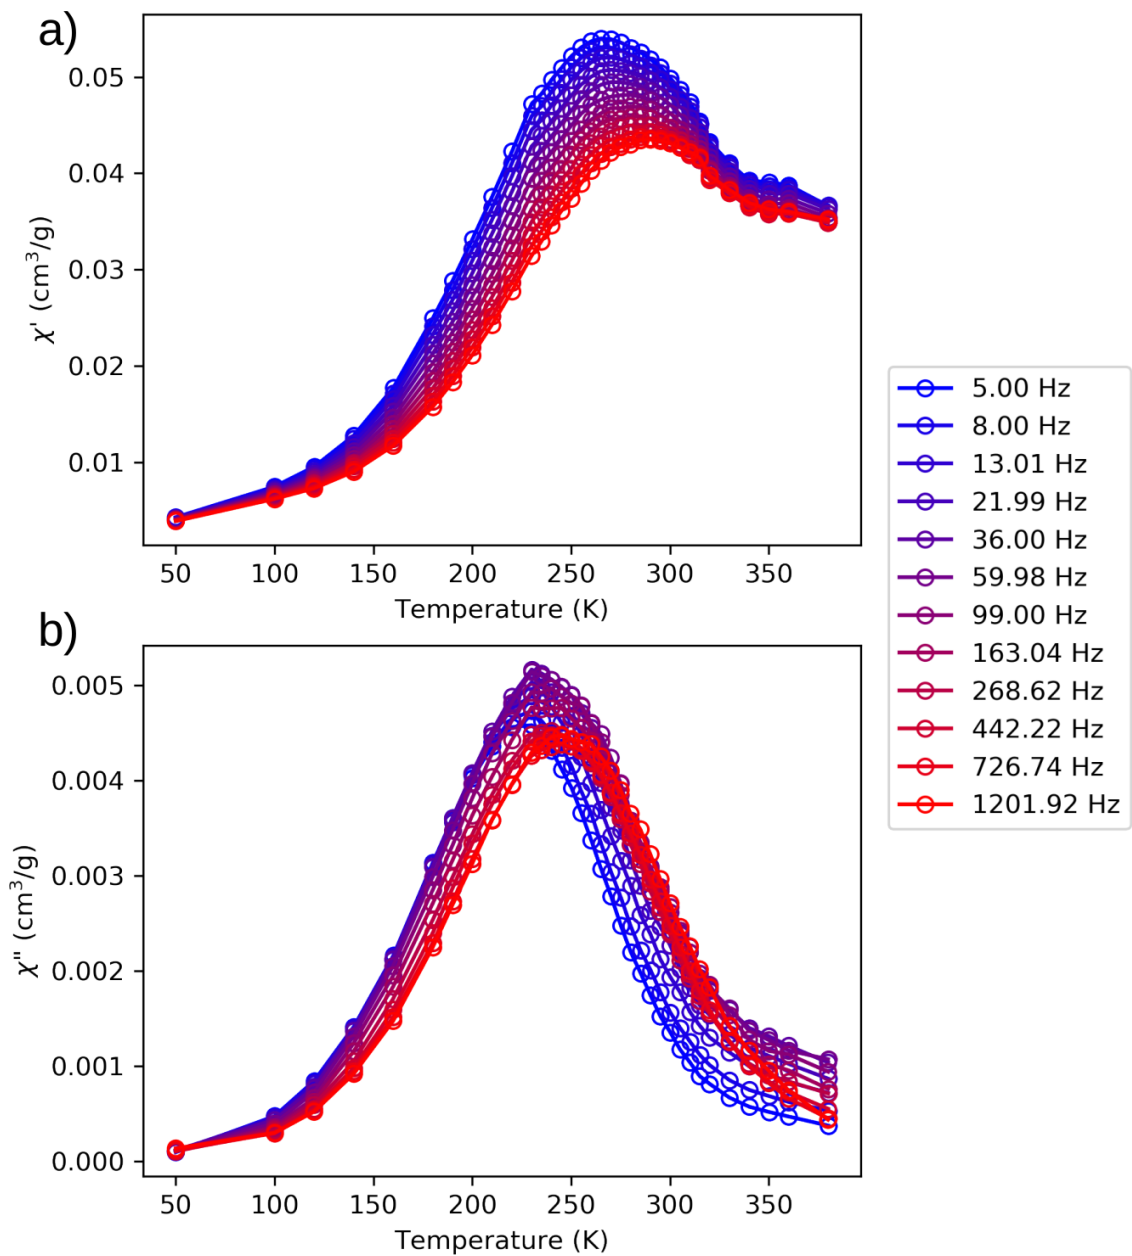

**Figure S8.** Temperature dependence of: (a) in-phase,  $\chi'$ , and (b) out-of-phase,  $\chi''$ , components of the ac magnetic susceptibility performed at different frequencies for IONP@SiO<sub>2</sub>-acac/Tb<sup>3+</sup>/Eu<sup>3+</sup> nanoparticles.

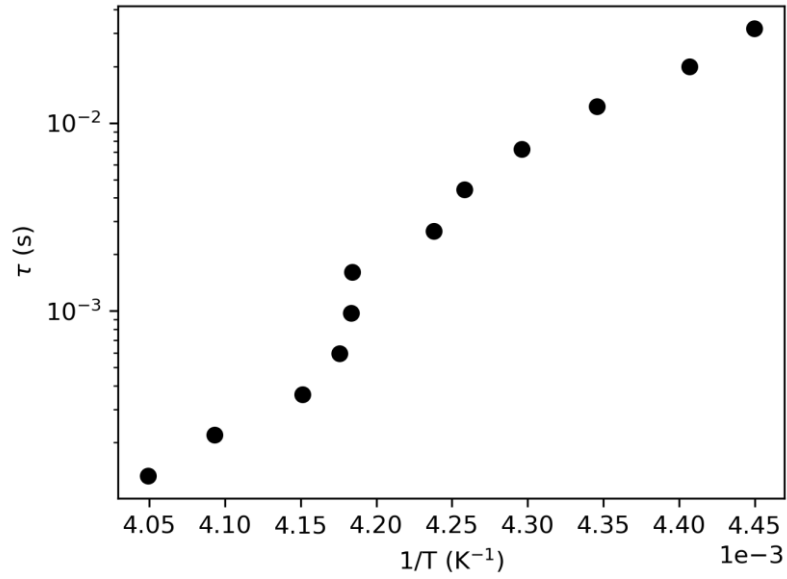

**Figure S9.** Relaxation time  $\tau$  vs  $1/T$  curve extracted from the frequency dependence of the out-of-phase component of the magnetic susceptibility.

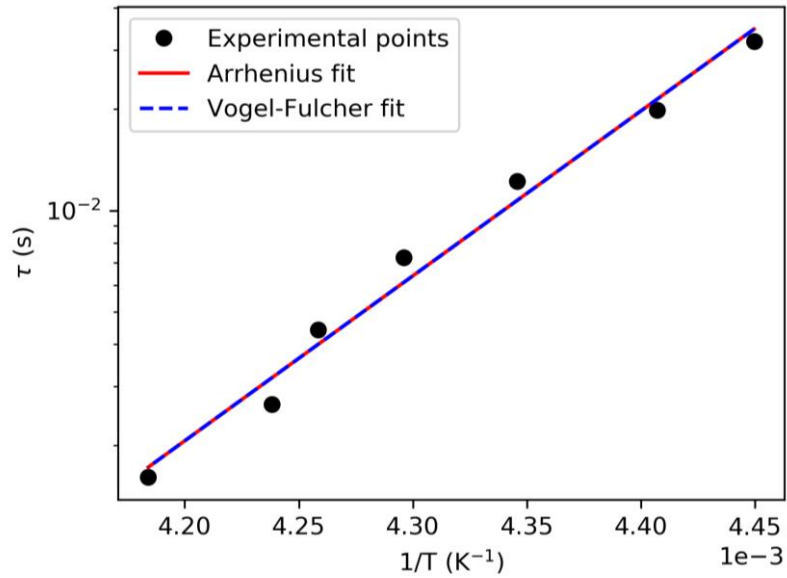

**Figure S10.** Low temperature region of relaxation time  $\tau$  vs  $1/T$  curve extracted from the frequency dependence of the out-of-phase component of the ac magnetic susceptibility (black circle) and its theoretical fit by using the Arrhenius model (red line) and the Vogel-Fulcher model (blue dashed line) for IONP@SiO<sub>2</sub>-acac/Tb<sup>3+</sup>/Eu<sup>3+</sup> nanoparticles. *Note:* The fitting of the relaxation time with the Vogel-Fulcher model (equation S2), the values of  $E_a$ ,  $\tau_0$  and  $T_0$  for IONP@SiO<sub>2</sub>-acac/Tb<sup>3+</sup>/Eu<sup>3+</sup> nanoparticles are equal to  $7853 \pm 345 \text{ cm}^{-1}$ ,  $10^{-23.3 \pm 0.9} \text{ s}$  and  $5 \cdot 10^{-11} \pm 1 \cdot 10^{-6} \text{ K}$ , respectively. The Vogel-Fulcher model, which takes into account the interparticle interactions, leads to conclusion that the dipolar magnetic interactions do not occur for IONP@SiO<sub>2</sub>-acac/Tb<sup>3+</sup>/Eu<sup>3+</sup> nanoparticles since the values of the energy barrier and the attempt time  $\tau_0$  were not

modified in comparison with the Néel law fit. Moreover, the obtained parameter  $T_0$ , which represents the impact of the interactions, is very low.

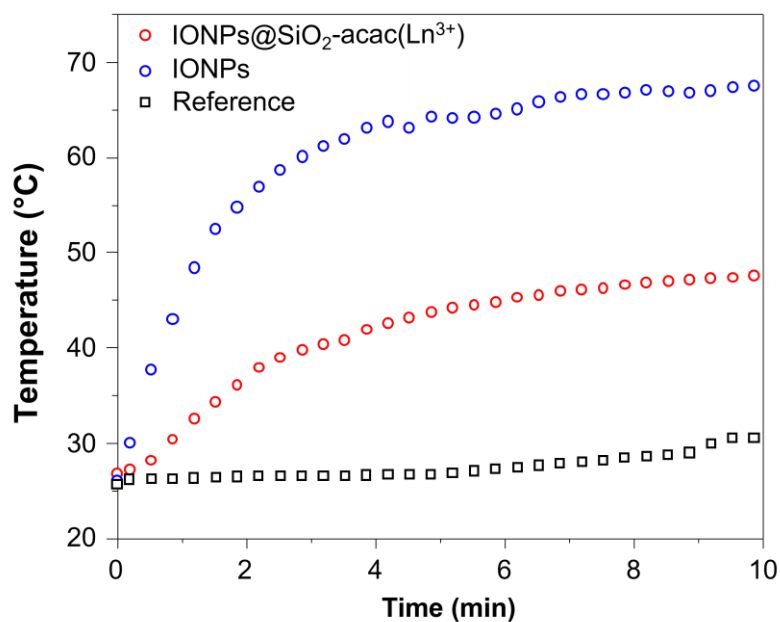

**Figure S11.** Temperature measurements as a function of time of IONP/OA/OA (red) in cyclohexane and IONP@SiO<sub>2</sub>-acac/Ln<sup>3+</sup> solution in ethanol (blue) and reference (black) subjected to an ac magnetic field ( $\approx 20$  mT at a frequency of 350 kHz).

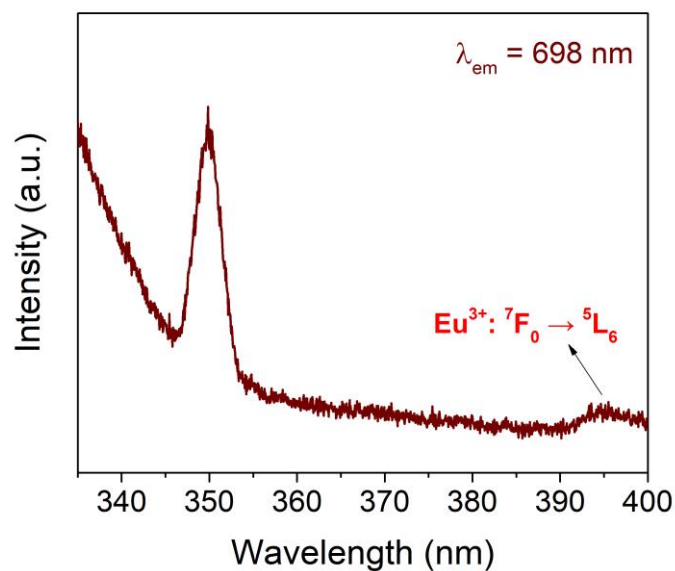

**Figure S12.** High-resolution spectrum of excitation spectrum monitored at 698 nm. The peak at 348 nm is the half-order of the monitored wavelength.

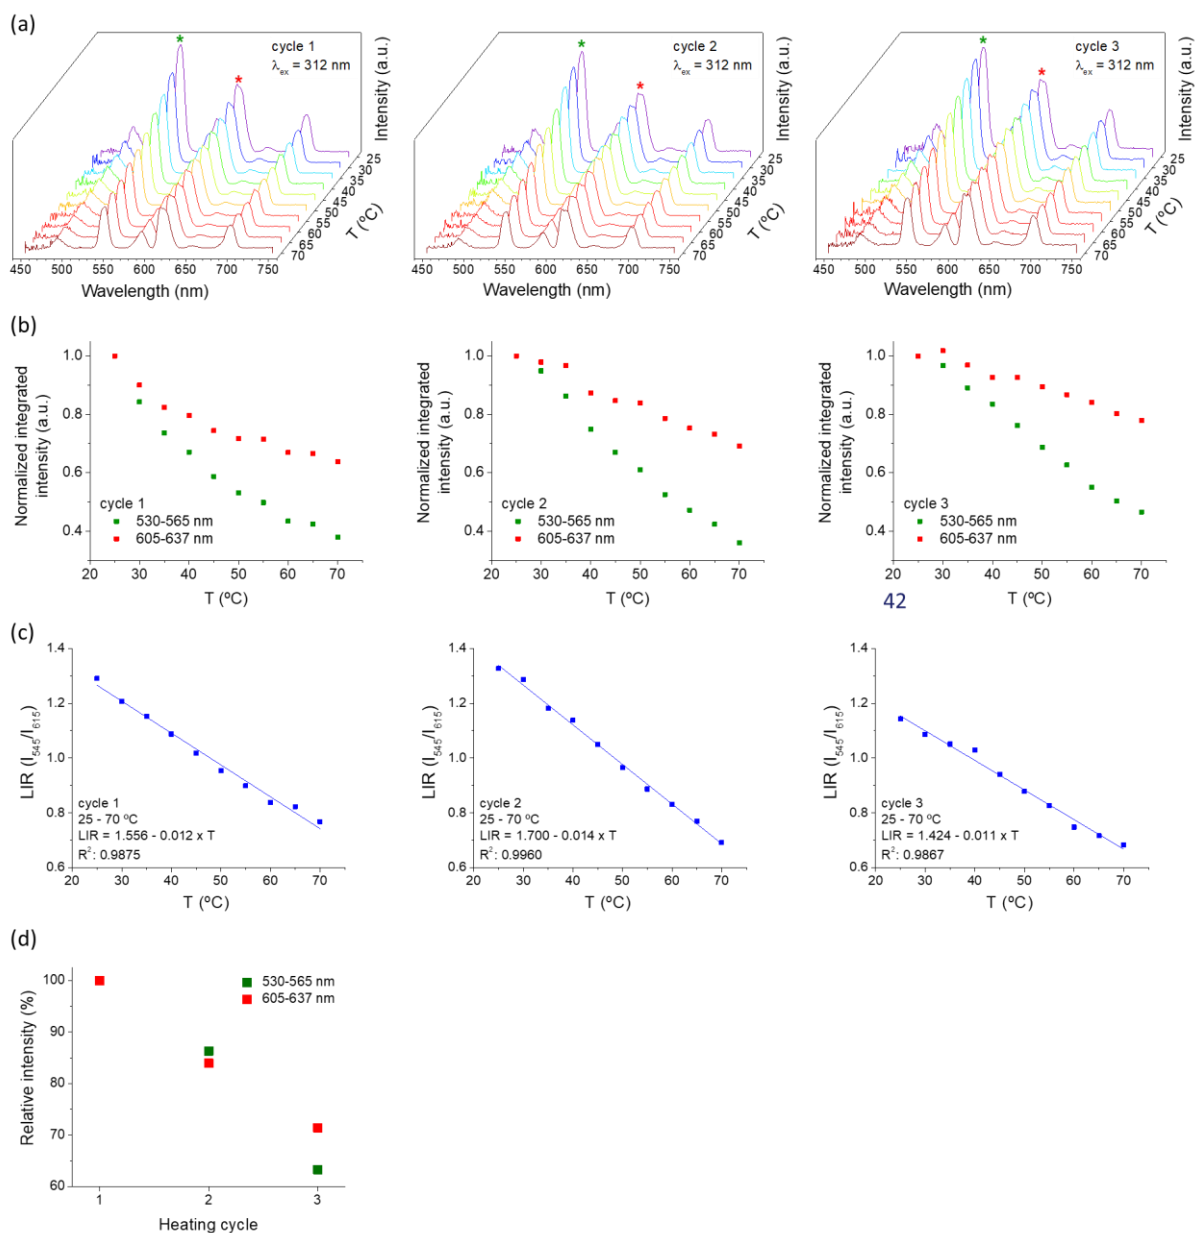

**Figure S13.** (a) Emission spectra ( $\lambda_{ex}=312$  nm) at different temperatures for IONP@SiO<sub>2</sub>-acac/Tb<sup>3+</sup>/Eu<sup>3+</sup> obtained upon three consecutive temperature cycles; (b) their respective normalized integrated intensities; and (c) LIR between 545 nm and 615 nm. Wavelength ranges for integrating area: 530–565 nm (Tb<sup>3+</sup>: <sup>5</sup>D<sub>4</sub> → <sup>7</sup>F<sub>5</sub>) and 603–637 nm (Eu<sup>3+</sup>: <sup>5</sup>D<sub>0</sub> → <sup>7</sup>F<sub>2</sub>). (d) Relative intensity of green and red emissions at 25 °C along the heating cycles.

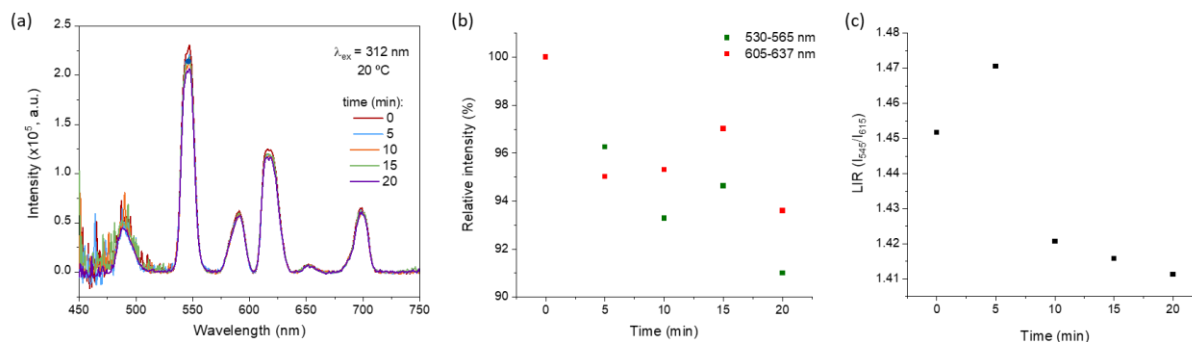

**Figure S14.** (a) Emission spectra of IONP@SiO<sub>2</sub>-acac/Ln<sup>3+</sup> measured after different periods of exposure to excitation light ( $\lambda_{\text{ex}} = 312$  nm). (b) Relative intensities at 545 nm and 615 nm normalized to the spectrum measured at time  $t = 0$ . Wavelength ranges for integrating areas: 530–565 nm (Tb<sup>3+</sup>: <sup>5</sup>D<sub>4</sub> → <sup>7</sup>F<sub>5</sub>) and 603–637 nm (Eu<sup>3+</sup>: <sup>5</sup>D<sub>0</sub> → <sup>7</sup>F<sub>2</sub>). (c) LIR between 545 nm and 615 nm emissions showing the low variation in the thermometric parameter ( $\text{LIR} = 1.43 \pm 0.3$ , relative standard deviation is 1.8 %) along with the time.

## References

- [1] F. M. Abdel Kerim, H. F. Aly, A. El-Agramy, *Proc. Indian Acad. Sci.* 1977, **85**, No. 6, 559-566.
- [2] A. Okamura, S. Nakamura, M. Tanaka, and K. Siratori, *J. Phys. Soc. Jpn.*, 1995, **64**, 3484.
- [3] A. A. Lykasov, V. V. D'Yachuk, and G. I Sergeev, *Inorg. Mater.*, 1985, **21**, 522.
- [4] J. A. Rojas, L. A. Ardila-Rodríguez, M. F. Diniz, M. Gonçalves, B. Ribeiro, and M. C. Rezende, *Materials & Design*, 2019, **166**, 107612.
- [5] X. Zhang, L. Clime, H. Roberge, F. Normandin, L. H. Yahia, E. Sacher, and T. Veres, *J. Phys. Chem. C*, 2011, **115**, 1436.
- [6] H. Peng, T. Dong, L. Zhang, C. Wang, W. Liu, J. Bao, X. Wang, N. Zhang, Z. Wang, P. Wu, P. Zhang, S. Dai, *Appl. Catal. B*, 2019, **256**, 117807
- [7] J. Mielby, A. J. Kunov-Kruse, S. Kegnæs, *J. Catal.* 2017, **345**, 149–156.
